# Supplementary material for: Development and Validation of Three Triplex Real-Time RT-PCR Assays for Typing African Horse Sickness Virus: Utility for Disease Control and Other Laboratory Applications
Source: MDPI journal article supplement (doi:10.3390/v16030470), 2024-03-20
Supplement: s1 [file s1]

**Table S1.** Analysis of serial dilutions of the nine AHSV prototype strain (serotypes 1 to 9) by GS rRT-PCR method described by Agüero, 2008 and TS rRT-PCRs in triplex and single.

| Dilution          | TS Triplex     | TS Single      | GS rRT-PCR     | TS Triplex        | TS Single      | GS rRT-PCR     |
|-------------------|----------------|----------------|----------------|-------------------|----------------|----------------|
| <b>Serotype 1</b> |                |                |                | <b>Serotype 2</b> |                |                |
| -1                | POS (18.0±0.1) | POS (16.6±0.1) | POS (21.8)     | POS (18.9±0.1)    | POS (15.7±0.1) | POS (18.9)     |
| -2                | POS (22.7±0.4) | POS (20.8±0.3) | POS (24.7±0.1) | POS (22.2±0.3)    | POS (18.8±0.2) | POS (22.1±0.1) |
| -3                | POS (26.3±0.3) | POS (24.7±0.2) | POS (27.1±1.5) | POS (25.8±0.6)    | POS (22.4±0.2) | POS (25.4±0.5) |
| -4                | POS (29.9±0.2) | POS (28.3±0.4) | POS (32.1±0.3) | POS (29.6±0.3)    | POS (26.5±0.3) | POS (29.6±0.0) |
| -5                | POS (33.8±0.5) | POS (32.9±0.6) | INC (35.6±0.6) | POS (33.4±0.5)    | POS (29.9±0.3) | POS (33.0±0.4) |
| -6                | INC (38.2±1.3) | INC (36.5±0.3) | NEG            | INC (36.6±0.5)    | POS (32.9±0.2) | INC (36.1±0.0) |
| -7                | NEG            | NEG            | NEG            | INC (39.4±1.0)    | INC (36.2±0.4) | INC (38.8±1.8) |
| <b>Serotype 3</b> |                |                |                | <b>Serotype 4</b> |                |                |
| -1                | POS (19.4±0.6) | POS (17.5±0.1) | POS (21.9)     | POS (18.1±0.1)    | POS (17.0±0.4) | POS (21.5)     |
| -2                | POS (23.7±0.4) | POS (21.0±0.2) | POS (25.4±0.4) | POS (21.3±0.1)    | POS (20.0±0.2) | POS (24.4±0.1) |
| -3                | POS (26.5±0.6) | POS (24.8±0.3) | POS (28.8±0.7) | POS (24.7±0.1)    | POS (23.2±0.4) | POS (27.8±0.3) |
| -4                | POS (29.9±0.9) | POS (26.8±0.2) | POS (32.8±0.1) | POS (28.6±0.3)    | POS (26.9±0.2) | POS (31.9±0.0) |
| -5                | POS (33.4±1.3) | POS (30.5±0.4) | INC (35.3±0.2) | POS (32.1±0.2)    | POS (30.9±0.3) | INC (35.4±0.3) |
| -6                | INC (38.8±2.5) | INC (37.8±2.7) | NEG            | INC (35.4±0.2)    | POS (34.4±0.5) | INC (38.9±1.6) |
| -7                | NEG            | INC (37.7±2.7) | NEG            | INC (38.9±1.3)    | INC (39.4±1.3) | NEG            |
| <b>Serotype 5</b> |                |                |                | <b>Serotype 6</b> |                |                |
| -1                | POS (17.2±0.1) | POS (14.0±0.1) | POS (16.2)     | POS (19.7±0.1)    | POS (14.3±0.1) | POS (18)       |
| -2                | POS (20.1±0.2) | POS (16.9±0.2) | POS (19.5±0.0) | POS (22.1±0.7)    | POS (17.7±0.6) | POS (20.7±0.9) |
| -3                | POS (23.5±0.1) | POS (20.1±0.1) | POS (22.6±0.4) | POS (25.4±0.7)    | POS (20.8±0.4) | POS (23.3±0.8) |
| -4                | POS (27.3±0.7) | POS (23.9±0.2) | POS (26.7±0.3) | POS (29.2±0.8)    | POS (24.7±0.8) | POS (27.4±1.5) |
| -5                | POS (31.2±0.3) | POS (27.3±0.5) | POS (32.5±3.0) | POS (33.4±0.9)    | POS (28.9±0.7) | POS (31.7±0.9) |
| -6                | POS (34.7±0.4) | POS (30.5±0.3) | POS (33.6±0.5) | POS (33.4±0.9)    | POS (33.5±0.4) | INC (38.3±2.4) |
| -7                | INC (38.2±1.1) | POS (34.1±0.6) | INC (37.0±0.2) | NEG               | INC (36.5±1.7) | NEG            |
| <b>Serotype 7</b> |                |                |                | <b>Serotype 8</b> |                |                |
| -1                | POS (22.7±0.1) | POS (18.1±0.4) | POS (19.4)     | not done          | not done       | not done       |
| -2                | POS (26.1±0.2) | POS (21.9±0.1) | POS (23.0±0.4) | POS (21.6±1.2)    | POS (19.5±0.7) | POS (22.9±0.9) |
| -3                | POS (29.4±0.2) | POS (25.2±0.4) | POS (26.9±0.1) | POS (25.1±0.7)    | POS (23.4±1.4) | POS (26.6±0.6) |
| -4                | POS (33.1±0.5) | POS (28.2±0.3) | POS (30.7±0.4) | POS (29.8±0.4)    | POS (28.0±0.1) | POS (30.5±0.3) |
| -5                | INC (37.6±1.1) | POS (32.1±0.3) | POS (33.6±0.6) | POS (34.1±0.8)    | POS (31.9±0.3) | POS (34.3±0.3) |
| -6                | INC (39.7±0.6) | INC (36.2±0.7) | INC (37.4±0.1) | INC (35.4±0.2)    | INC (35.9±0.2) | INC (37.3±0.8) |
| -7                | NEG            | NEG            | INC (38.8±1.8) | INC (39.6±0.8)    | INC (39.5±1.0) | NEG            |
| <b>Serotype 9</b> |                |                |                |                   |                |                |
| -1                | POS (17.4±0.1) | POS (15.5±0.1) | POS (17.4)     |                   |                |                |
| -2                | POS (20.4±0.1) | POS (17.7±0.1) | POS (21.6±0.1) |                   |                |                |
| -3                | POS (23.7±0.2) | POS (21.4±0.7) | POS (25.2±0.5) |                   |                |                |
| -4                | POS (27.3±0.1) | POS (24.6±0.7) | POS (28.2±0.4) |                   |                |                |
| -5                | POS (31.2±0.4) | POS (28.7±0.8) | POS (32.2±0.5) |                   |                |                |
| -6                | POS (34.1±0.4) | POS (32.3±0.8) | INC (35.4±0.3) |                   |                |                |
| -7                | INC (37.7±0.6) | INC (35.2±0.6) | INC (39.0±1.4) |                   |                |                |

POS: positive; INC: inconclusive; NEG: negative; (Ct value average ± standard deviation)

**Table S2.** Results obtained on field AHSV isolates in cell culture collection.

| Strain<br>(source)  | Cell line | GS rRT-PCR | Triplex TS rRT-PCR |            |             | Triplex TS rRT-PCR |            |            | Triplex TS rRT-PCR |            |            |
|---------------------|-----------|------------|--------------------|------------|-------------|--------------------|------------|------------|--------------------|------------|------------|
|                     |           |            | Ser 1              | Ser 6      | Ser 8       | Ser 2              | Ser 4      | Ser 9      | Ser 3              | Ser 5      | Ser 7      |
| SEN2007 st2 (TPI)   | B         | POS (18.4) | Neg                | Neg        | Neg         | POS (17.2)         | Neg        | Neg        | Neg                | Neg        | Neg        |
| SEN2007 st7 (TPI)   | V         | POS (18.1) | Neg                | Neg        | POS (32.8)† | Neg                | Neg        | Neg        | Neg                | Neg        | POS (19.4) |
| KEN2006 st9 (TPI)   | KC        | POS (18.8) | Neg                | Neg        | Neg         | Neg                | Neg        | POS (19.9) | Neg                | Neg        | Neg        |
| KEN2007 st4 (TPI)   | B         | POS (21.0) | Neg                | Neg        | Neg         | Neg                | POS (18.7) | Neg        | Neg                | Neg        | Neg        |
| GHA2010 st2 (TPI)   | V         | POS (31.5) | Neg                | Neg        | Neg         | POS (32.6)         | Neg        | Neg        | Neg                | Neg        | Neg        |
| ETH2010 st6 (TPI)   | B         | POS (19.1) | Neg                | POS (17.4) | Neg         | Neg                | Neg        | Neg        | Neg                | Neg        | Neg        |
| ETH2010 st2 (TPI)   | V         | POS (24.3) | Neg                | Neg        | INC (36.5)† | POS (17.2)         | Neg        | Neg        | Neg                | Neg        | Neg        |
| ETH2010 st4 (TPI)   | B         | POS (32.6) | Neg                | Neg        | Neg         | Neg                | POS (17.7) | Neg        | Neg                | Neg        | Neg        |
| ETH2010 st8 (TPI)   | B         | POS (23.6) | Neg                | Neg        | POS (18.8)  | Neg                | Neg        | Neg        | Neg                | Neg        | Neg        |
| ETH2010 st9 (TPI)   | B         | POS (24.6) | Neg                | Neg        | Neg         | Neg                | Neg        | POS (26.1) | Neg                | Neg        | Neg        |
| KEN st1 (CVR)       | V         | POS (21.4) | POS (20.6)         | Neg        | Neg         | Neg                | Neg        | Neg        | Neg                | Neg        | Neg        |
| KEN st4 (CVR)       | B         | POS (19.6) | Neg                | Neg        | Neg         | Neg                | POS (17.5) | Neg        | Neg                | Neg        | Neg        |
| KEN st5 (CVR)       | B         | POS (16.8) | Neg                | Neg        | Neg         | Neg                | Neg        | Neg        | Neg                | POS (18.2) | Neg        |
| KEN st7 (CVR)       | B         | POS (17.1) | Neg                | Neg        | Neg         | Neg                | Neg        | Neg        | Neg                | Neg        | POS (21.3) |
| KEN st8 (CVR)       | B         | POS (20.5) | Neg                | Neg        | POS (20.9)  | Neg                | Neg        | Neg        | Neg                | Neg        | Neg        |
| KEN st9 (CVR)       | B         | POS (26.8) | Neg                | Neg        | Neg         | Neg                | Neg        | POS (19.5) | Neg                | Neg        | Neg        |
| KEN2015 st2 (CVR)*  | B         | POS (18.2) | Neg                | Neg        | Neg         | POS (16.2)         | Neg        | Neg        | Neg                | Neg        | Neg        |
| KEN2013 st4 (CVR)   | B         | POS (20.2) | Neg                | Neg        | Neg         | Neg                | POS (17.9) | Neg        | Neg                | Neg        | Neg        |
| KEN2015 st7 (CVR)*  | B         | POS (18.6) | Neg                | Neg        | Neg         | Neg                | Neg        | Neg        | Neg                | Neg        | POS (19.7) |
| KEN2016 st4 (CVR)*  | B         | POS (22.3) | Neg                | Neg        | Neg         | Neg                | POS (23.7) | Neg        | Neg                | Neg        | Neg        |
| KEN2017 st5 (CVR)*  | V         | POS (19.4) | Neg                | Neg        | INC (35.3)† | Neg                | Neg        | Neg        | Neg                | POS (18.5) | Neg        |
| SPA1988 st4 (LCV)   | V         | POS (16.2) | Neg                | Neg        | POS (31.9)† | Neg                | POS (14)   | Neg        | Neg                | Neg        | Neg        |
| SPA1989 st4 (LCV)   | V         | POS (18.4) | Neg                | Neg        | INC (36.7)† | Neg                | POS (15.4) | Neg        | Neg                | Neg        | Neg        |
| SPA1990 st4 (LCV)   | V         | POS (21.8) | Neg                | Neg        | POS (30.7)† | Neg                | POS (18.4) | Neg        | Neg                | Neg        | Neg        |
| SPA1987 st3 (LCV)   | V         | POS (19.7) | Neg                | Neg        | POS (32.8)† | Neg                | Neg        | Neg        | POS (15.5)         | Neg        | Neg        |
| SPA1987 st2 (LCV)   | V         | POS (19.4) | Neg                | Neg        | POS (33.1)† | POS (18.1)         | Neg        | Neg        | Neg                | Neg        | Neg        |
| THA2020 st1 (NIAH)* | V         | POS (31.7) | POS (24.7)         | Neg        | Neg         | Neg                | Neg        | Neg        | Neg                | Neg        | Neg        |

TPI: The Pirbright Institute; CVR: Central Veterinary Research Laboratory; LCV: Laboratorio Central de Veterinaria; NIAH: National Institute of Animal Health; B: BHK; V: Vero

Neg: negative; POS: positive (Ct value); INC: inconclusive (Ct value)

\*Virus isolated in the LCV from clinical samples received from this source

†Negative in single TS rRT-PCR serotype 8

**Table S3.** Results obtained on clinical samples (16 spleen and 3 brain) from Spanish outbreak during the period 1987 – 1988.

| Identification | Year | GS rRT-PCR | Triplex TS rRT-PCR |       |       | Triplex TS rRT-PCR |            |            | Triplex TS rRT-PCR |       |       |
|----------------|------|------------|--------------------|-------|-------|--------------------|------------|------------|--------------------|-------|-------|
|                |      |            | Ser 1              | Ser 6 | Ser 8 | Ser 2              | Ser 4      | Ser 9      | Ser 3              | Ser 5 | Ser 7 |
| 1528/87 (1)    | 1987 | POS (25.7) | Neg                | Neg   | Neg   | Neg                | POS (22.8) | Neg        | Neg                | Neg   | Neg   |
| 1528/87 (2)    | 1987 | POS (26.6) | Neg                | Neg   | Neg   | Neg                | POS (21.6) | Neg        | Neg                | Neg   | Neg   |
| 1537/87        | 1987 | POS (25.1) | Neg                | Neg   | Neg   | Neg                | POS (21.4) | Neg        | INC (36.01)        | Neg   | Neg   |
| 1560/87        | 1987 | POS (24.8) | Neg                | Neg   | Neg   | Neg                | POS (19.4) | Neg        | Neg                | Neg   | Neg   |
| 1661/87        | 1987 | POS (21.8) | Neg                | Neg   | Neg   | Neg                | POS (18.8) | Neg        | Neg                | Neg   | Neg   |
| 1694/87 (28)   | 1987 | POS (21.6) | Neg                | Neg   | Neg   | Neg                | POS (19.0) | POS (27.7) | POS (26.6)         | Neg   | Neg   |
| 1724/87        | 1987 | POS (22.1) | Neg                | Neg   | Neg   | Neg                | POS (19.8) | Neg        | Neg                | Neg   | Neg   |
| 1735/87        | 1987 | POS (22.4) | Neg                | Neg   | Neg   | Neg                | POS (18.9) | POS (27.2) | POS (32.1)         | Neg   | Neg   |
| 1775/87*       | 1987 | POS (28.1) | Neg                | Neg   | Neg   | Neg                | INC (36.0) | Neg        | POS (25.4)         | Neg   | Neg   |
| 1841/87*       | 1987 | POS (30.6) | Neg                | Neg   | Neg   | Neg                | INC (35.6) | Neg        | POS (29.8)         | Neg   | Neg   |
| 1841/87 (1)    | 1987 | POS (32.3) | Neg                | Neg   | Neg   | Neg                | POS (30.2) | Neg        | POS (34.2)         | Neg   | Neg   |

|              |      |            |     |     |     |            |            |            |            |            |     |
|--------------|------|------------|-----|-----|-----|------------|------------|------------|------------|------------|-----|
| 1903/87*     | 1987 | POS (30.6) | Neg | Neg | Neg | POS (31.4) | POS (32.9) | Neg        | Neg        | Neg        | Neg |
| 1955/87      | 1987 | POS (29.1) | Neg | Neg | Neg | Neg        | POS (28.9) | POS (31.7) | POS (34.4) | POS (33.6) | Neg |
| 1722/88 (3)  | 1988 | POS (22.8) | Neg | Neg | Neg | Neg        | POS (21.5) | Neg        | POS (34.9) | Neg        | Neg |
| 1722/88 (5)  | 1988 | POS (24.6) | Neg | Neg | Neg | Neg        | POS (21.8) | Neg        | Neg        | Neg        | Neg |
| 1722/88 (12) | 1988 | POS (22.4) | Neg | Neg | Neg | Neg        | POS (20.0) | Neg        | Neg        | Neg        | Neg |
| 1772/88 (7)  | 1988 | POS (23.3) | Neg | Neg | Neg | Neg        | POS (20.6) | Neg        | Neg        | Neg        | Neg |
| 1832/88 (3)  | 1988 | POS (25.2) | Neg | Neg | Neg | Neg        | POS (23.0) | Neg        | POS (29.4) | Neg        | Neg |
| 1943/88 (4)  | 1988 | POS (25.2) | Neg | Neg | Neg | Neg        | POS (23.6) | Neg        | POS (28.7) | Neg        | Neg |

Neg: negative; POS: positive (Ct value); INC: inconclusive (Ct value)

\*Brain samples. Remainder samples were spleen.

**Table S4.** Results obtained on clinical samples from AHS outbreak in Thailand (2020). Source of samples: National Institute of Animal Health, Thailand.

| Identification | Year       | GS rRT-PCR | Triplex TS rRT-PCR |       |       | Triplex TS rRT-PCR |       |       | Triplex TS rRT-PCR |       |       |
|----------------|------------|------------|--------------------|-------|-------|--------------------|-------|-------|--------------------|-------|-------|
|                |            |            | Ser 1              | Ser 6 | Ser 8 | Ser 2              | Ser 4 | Ser 9 | Ser 3              | Ser 5 | Ser 7 |
| R.1127/20 (20) | EDTA Blood | POS (22.2) | POS (26.4)         | Neg   | Neg   | Neg                | Neg   | Neg   | Neg                | Neg   | Neg   |
| R.1127/20 (21) | EDTA Blood | POS (22.2) | POS (26.1)         | Neg   | Neg   | Neg                | Neg   | Neg   | Neg                | Neg   | Neg   |
| R.1127/20 (22) | EDTA Blood | POS (21.7) | POS (24.6)         | Neg   | Neg   | Neg                | Neg   | Neg   | Neg                | Neg   | Neg   |
| R.1127/20 (23) | EDTA Blood | POS (22.8) | POS (25.0)         | Neg   | Neg   | Neg                | Neg   | Neg   | Neg                | Neg   | Neg   |
| R.1127/20 (24) | EDTA Blood | POS (24.7) | POS (28.1)         | Neg   | Neg   | Neg                | Neg   | Neg   | Neg                | Neg   | Neg   |
| R.1127/20 (25) | EDTA Blood | POS (28.1) | POS (33.5)         | Neg   | Neg   | Neg                | Neg   | Neg   | Neg                | Neg   | Neg   |
| R.1127/20 (26) | EDTA Blood | POS (21.4) | POS (30.3)         | Neg   | Neg   | Neg                | Neg   | Neg   | Neg                | Neg   | Neg   |
| R.1127/20 (27) | Tissue     | POS (23.8) | POS (28.5)         | Neg   | Neg   | Neg                | Neg   | Neg   | Neg                | Neg   | Neg   |
| R.1127/20 (28) | Tissue     | POS (22.1) | POS (25.4)         | Neg   | Neg   | Neg                | Neg   | Neg   | Neg                | Neg   | Neg   |
| R.1127/20 (29) | Tissue     | POS (24.3) | POS (28.1)         | Neg   | Neg   | Neg                | Neg   | Neg   | Neg                | Neg   | Neg   |
| R.1127/20 (30) | RNA        | POS (25.3) | POS (24.4)         | Neg   | Neg   | Neg                | Neg   | Neg   | Neg                | Neg   | Neg   |
| R.1127/20 (31) | RNA        | POS (24.5) | POS (30.7)         | Neg   | Neg   | Neg                | Neg   | Neg   | Neg                | Neg   | Neg   |
| R.1127/20 (32) | RNA        | POS (24.5) | POS (27.9)         | Neg   | Neg   | Neg                | Neg   | Neg   | Neg                | Neg   | Neg   |
| R.1127/20 (33) | RNA        | POS (18.2) | POS (21.3)         | Neg   | Neg   | Neg                | Neg   | Neg   | POS (33.4)         | Neg   | Neg   |
| R.1127/20 (35) | RNA        | POS (25.6) | POS (32.2)         | Neg   | Neg   | Neg                | Neg   | Neg   | Neg                | Neg   | Neg   |

Neg: negative; POS: positive (Ct value)

**Table S5.** Results obtained on clinical samples from AHS outbreak in Nigeria (2022-23). Source of samples: National Veterinary Research Institute, Nigeria.

| Identification | Year             | GS rRT-PCR | Triplex TS rRT-PCR |       |       | Triplex TS rRT-PCR |       |       | Triplex TS rRT-PCR |       |            |
|----------------|------------------|------------|--------------------|-------|-------|--------------------|-------|-------|--------------------|-------|------------|
|                |                  |            | Ser 1              | Ser 6 | Ser 8 | Ser 2              | Ser 4 | Ser 9 | Ser 3              | Ser 5 | Ser 7      |
| R.1507/23 (8)  | Tissue (spleen)  | POS (22.8) | Neg                | Neg   | Neg   | Neg                | Neg   | Neg   | Neg                | Neg   | POS (23.2) |
| R.1507/23 (9)  | Tissue (liver)   | POS (24.5) | Neg                | Neg   | Neg   | Neg                | Neg   | Neg   | Neg                | Neg   | POS (24.2) |
| R.1507/23 (10) | Tissue (heart)   | POS (21.9) | Neg                | Neg   | Neg   | Neg                | Neg   | Neg   | Neg                | Neg   | POS (22.4) |
| R.1507/23 (11) | Tissue (trachea) | POS (30.9) | Neg                | Neg   | Neg   | Neg                | Neg   | Neg   | Neg                | Neg   | POS (31.7) |
| R.1507/23 (12) | Tissue (viscera) | POS (23.6) | Neg                | Neg   | Neg   | Neg                | Neg   | Neg   | Neg                | Neg   | POS (23.8) |
| R.1507/23 (13) | Tissue (viscera) | POS (26.3) | Neg                | Neg   | Neg   | Neg                | Neg   | Neg   | Neg                | Neg   | POS (26.6) |
| R.1507/23 (14) | Tissue (trachea) | POS (29.5) | Neg                | Neg   | Neg   | Neg                | Neg   | Neg   | Neg                | Neg   | POS (29.7) |
| R.1507/23 (15) | Tissue (heart)   | POS (24.6) | Neg                | Neg   | Neg   | Neg                | Neg   | Neg   | Neg                | Neg   | POS (24.7) |
| R.1507/23 (16) | Tissue (liver)   | POS (24.9) | Neg                | Neg   | Neg   | Neg                | Neg   | Neg   | Neg                | Neg   | POS (25.0) |
| R.1507/23 (17) | Tissue (spleen)  | POS (20.8) | Neg                | Neg   | Neg   | Neg                | Neg   | Neg   | Neg                | Neg   | POS (21.9) |

Neg: negative; POS: positive (Ct value)

**Table S6.** Results obtained on untyped clinical samples from Kenya (2015 - 2017). Source of samples: Central Veterinary Research Laboratory, Dubai, UAE

| Identification | Type | GS rRT-PCR | Triplex TS rRT-PCR |       |       | Triplex TS rRT-PCR |            |            | Triplex TS rRT-PCR |            |            |
|----------------|------|------------|--------------------|-------|-------|--------------------|------------|------------|--------------------|------------|------------|
|                |      |            | Ser 1              | Ser 6 | Ser 8 | Ser 2              | Ser 4      | Ser 9      | Ser 3              | Ser 5      | Ser 7      |
| 2441/15 17     | B    | POS (30.6) | Neg                | Neg   | Neg   | Neg                | Neg        | POS (27.7) | Neg                | Neg        | Neg        |
| 2441/15 19     | B    | POS (26.9) | Neg                | Neg   | Neg   | POS (25.9)         | Neg        | Neg        | Neg                | Neg        | Neg        |
| 2441/15 20     | B    | POS (31.3) | POS (31.4)         | Neg   | Neg   | Neg                | Neg        | Neg        | Neg                | Neg        | Neg        |
| 2441/15 13     | B    | POS (24.8) | Neg                | Neg   | Neg   | Neg                | Neg        | Neg        | Neg                | POS (23.9) | Neg        |
| 2782/15 1      | B    | POS (29.8) | Neg                | Neg   | Neg   | POS (27.3)         | Neg        | Neg        | Neg                | Neg        | Neg        |
| 2782/15 2      | B    | POS (32.5) | Neg                | Neg   | Neg   | POS (31.6)         | Neg        | Neg        | Neg                | Neg        | Neg        |
| 2782/15 3      | B    | POS (24.9) | Neg                | Neg   | Neg   | POS (23.6)         | Neg        | Neg        | Neg                | Neg        | Neg        |
| 256/16 2       | B    | POS (26.9) | Neg                | Neg   | Neg   | Neg                | POS (23.0) | Neg        | Neg                | Neg        | Neg        |
| 256/16 3       | B    | POS (27.4) | Neg                | Neg   | Neg   | Neg                | Neg        | POS (23.7) | Neg                | Neg        | Neg        |
| 256/16 4       | B    | POS (27.2) | Neg                | Neg   | Neg   | Neg                | Neg        | Neg        | Neg                | Neg        | POS (26.5) |
| 377/16 2       | B    | POS (29.8) | Neg                | Neg   | Neg   | Neg                | POS (27.4) | Neg        | Neg                | Neg        | Neg        |
| 377/16 3       | B    | POS (26.3) | Neg                | Neg   | Neg   | Neg                | POS (23.4) | Neg        | Neg                | Neg        | Neg        |
| 841/16 8       | B    | POS (28.0) | Neg                | Neg   | Neg   | Neg                | POS (24.8) | Neg        | Neg                | Neg        | Neg        |
| 841/16 9       | B    | POS (25.8) | Neg                | Neg   | Neg   | Neg                | Neg        | Neg        | Neg                | Neg        | POS (25.9) |
| 841/16 10      | B    | POS (28.1) | Neg                | Neg   | Neg   | POS (22.8)         | Neg        | Neg        | Neg                | Neg        | Neg        |
| 1766/16 2      | B    | POS (30.3) | Neg                | Neg   | Neg   | POS (28.7)         | Neg        | Neg        | Neg                | Neg        | Neg        |
| 1766/16 3      | B    | POS (29.8) | Neg                | Neg   | Neg   | POS (27.0)         | Neg        | Neg        | Neg                | Neg        | Neg        |
| 1766/16 4      | B    | POS (29.1) | Neg                | Neg   | Neg   | POS (27.1)         | Neg        | Neg        | Neg                | Neg        | Neg        |
| 1766/16 5      | B    | POS (29.5) | Neg                | Neg   | Neg   | Neg                | POS (26.2) | Neg        | Neg                | Neg        | Neg        |
| 2459/16 2      | B    | POS (31.6) | Neg                | Neg   | Neg   | Neg                | POS (26.8) | Neg        | Neg                | Neg        | Neg        |
| 2459/16 3      | B    | POS (30.0) | Neg                | Neg   | Neg   | Neg                | Neg        | POS (27.5) | Neg                | Neg        | Neg        |
| 2459/16 4      | B    | POS (28.0) | Neg                | Neg   | Neg   | Neg                | POS (23.9) | Neg        | Neg                | Neg        | Neg        |
| 2459/16 5      | B    | POS (30.6) | Neg                | Neg   | Neg   | Neg                | Neg        | Neg        | POS (24.7)         | Neg        | Neg        |
| 2772/16 1      | B    | POS (25.1) | Neg                | Neg   | Neg   | Neg                | Neg        | POS (23.1) | Neg                | Neg        | Neg        |
| 1083/17 1      | B    | POS (23.9) | Neg                | Neg   | Neg   | Neg                | Neg        | Neg        | Neg                | POS (25.7) | Neg        |
| 1838/17 1      | B    | POS (29.5) | Neg                | Neg   | Neg   | Neg                | Neg        | Neg        | Neg                | POS (28.9) | Neg        |
| 2441/15 11     | S    | POS (25.3) | Neg                | Neg   | Neg   | Neg                | Neg        | Neg        | Neg                | POS (26.0) | Neg        |
| 2441/15 16     | S    | POS (28.7) | Neg                | Neg   | Neg   | Neg                | POS (26.2) | Neg        | Neg                | Neg        | Neg        |
| 2782/15 4      | LI   | POS (28.9) | Neg                | Neg   | Neg   | POS (28.0)         | Neg        | Neg        | Neg                | Neg        | Neg        |
| 2782/15 5      | S    | POS (27.3) | Neg                | Neg   | Neg   | POS (25.2)         | Neg        | Neg        | Neg                | Neg        | Neg        |
| 2782/15 6      | LU   | POS (20.0) | Neg                | Neg   | Neg   | POS (17.2)         | Neg        | Neg        | Neg                | Neg        | Neg        |
| 2782/15 7      | H    | POS (32.3) | Neg                | Neg   | Neg   | POS (32.6)         | Neg        | Neg        | Neg                | Neg        | Neg        |
| 256/16 5       | LU   | POS (33.3) | Neg                | Neg   | Neg   | Neg                | POS (30.9) | Neg        | Neg                | Neg        | Neg        |
| 256/16 6       | H    | POS (32.5) | Neg                | Neg   | Neg   | Neg                | POS (19.4) | Neg        | Neg                | Neg        | Neg        |
| 256/16 7       | S    | POS (24.7) | Neg                | Neg   | Neg   | Neg                | POS (22.1) | Neg        | Neg                | Neg        | Neg        |
| 256/16 8       | LI   | POS (25.6) | Neg                | Neg   | Neg   | Neg                | POS (23.1) | Neg        | Neg                | Neg        | Neg        |
| 256/16 9       | LU   | POS (31.5) | Neg                | Neg   | Neg   | Neg                | Neg        | POS (28.6) | Neg                | Neg        | Neg        |
| 256/16 10      | H    | POS (22.4) | Neg                | Neg   | Neg   | Neg                | Neg        | POS (19.3) | Neg                | Neg        | Neg        |
| 256/16 11      | S    | POS (27.1) | Neg                | Neg   | Neg   | Neg                | Neg        | POS (24.5) | Neg                | Neg        | Neg        |
| 256/16 12      | LI   | POS (26.3) | Neg                | Neg   | Neg   | Neg                | Neg        | POS (22.9) | Neg                | Neg        | Neg        |
| 1766/16 8      | H    | POS (29.4) | Neg                | Neg   | Neg   | Neg                | POS (25.6) | Neg        | Neg                | Neg        | Neg        |
| 1766/16 9      | LU   | POS (32.4) | Neg                | Neg   | Neg   | Neg                | POS (28.9) | Neg        | Neg                | Neg        | Neg        |
| 2459/16 6      | LU   | POS (24.4) | Neg                | Neg   | Neg   | Neg                | Neg        | Neg        | Neg                | Neg        | POS (23.6) |
| 2459/16 9      | LI   | POS (26.4) | Neg                | Neg   | Neg   | Neg                | Neg        | Neg        | Neg                | Neg        | POS (25.4) |
| 2772/16 3      | H    | POS (26.8) | Neg                | Neg   | Neg   | Neg                | POS (24.1) | Neg        | Neg                | Neg        | Neg        |
| 2772/16 4      | S    | POS (26.9) | Neg                | Neg   | Neg   | Neg                | POS (25.2) | Neg        | Neg                | Neg        | Neg        |
| 2772/16 5      | S    | POS (26.5) | Neg                | Neg   | Neg   | Neg                | POS (24.7) | Neg        | Neg                | Neg        | Neg        |

Neg: negative; POS: positive (Ct value)  
B: EDTA blood; S: spleen; LU: lung; LI: liver; H: heart

[illegible]

---

|    |            |     |     |     |            |            |            |            |     |     |
|----|------------|-----|-----|-----|------------|------------|------------|------------|-----|-----|
| 39 | POS (30.6) | Neg | Neg | Neg | Neg        | INC (36.6) | Neg        | Neg        | Neg | Neg |
| 40 | POS (26.1) | Neg | Neg | Neg | POS (33.5) | Neg        | Neg        | Neg        | Neg | Neg |
| 41 | POS (26.7) | Neg | Neg | Neg | Neg        | Neg        | POS (26.3) | Neg        | Neg | Neg |
| 42 | Neg        | Neg | Neg | Neg | Neg        | Neg        | Neg        | Neg        | Neg | Neg |
| 43 | POS (28.6) | Neg | Neg | Neg | Neg        | Neg        | Neg        | POS (32.2) | Neg | Neg |
| 44 | POS (28.9) | Neg | Neg | Neg | Neg        | POS (32.5) | Neg        | Neg        | Neg | Neg |
| 45 | Neg        | Neg | Neg | Neg | Neg        | Neg        | Neg        | Neg        | Neg | Neg |
| 46 | Neg        | Neg | Neg | Neg | Neg        | Neg        | Neg        | Neg        | Neg | Neg |
| 47 | Neg        | Neg | Neg | Neg | Neg        | Neg        | Neg        | Neg        | Neg | Neg |
| 48 | Neg        | Neg | Neg | Neg | Neg        | Neg        | Neg        | Neg        | Neg | Neg |
| 49 | Neg        | Neg | Neg | Neg | Neg        | Neg        | Neg        | Neg        | Neg | Neg |
| 50 | POS (26.7) | Neg | Neg | Neg | POS (32.4) | Neg        | Neg        | Neg        | Neg | Neg |

---

Neg: negative; POS: positive (Ct value); INC: inconclusive (Ct value)
